# Supplementary figures and images for: tRNATyr has an unusually short half-life in Trypanosoma brucei
Source: PubMed Central journal article supplement — RNA. 2023 Aug;29(8):1243–54. doi: 10.1261/rna.079674.123 (PMC10351884; doi:10.1261/rna.079674.123), 2023-08

A

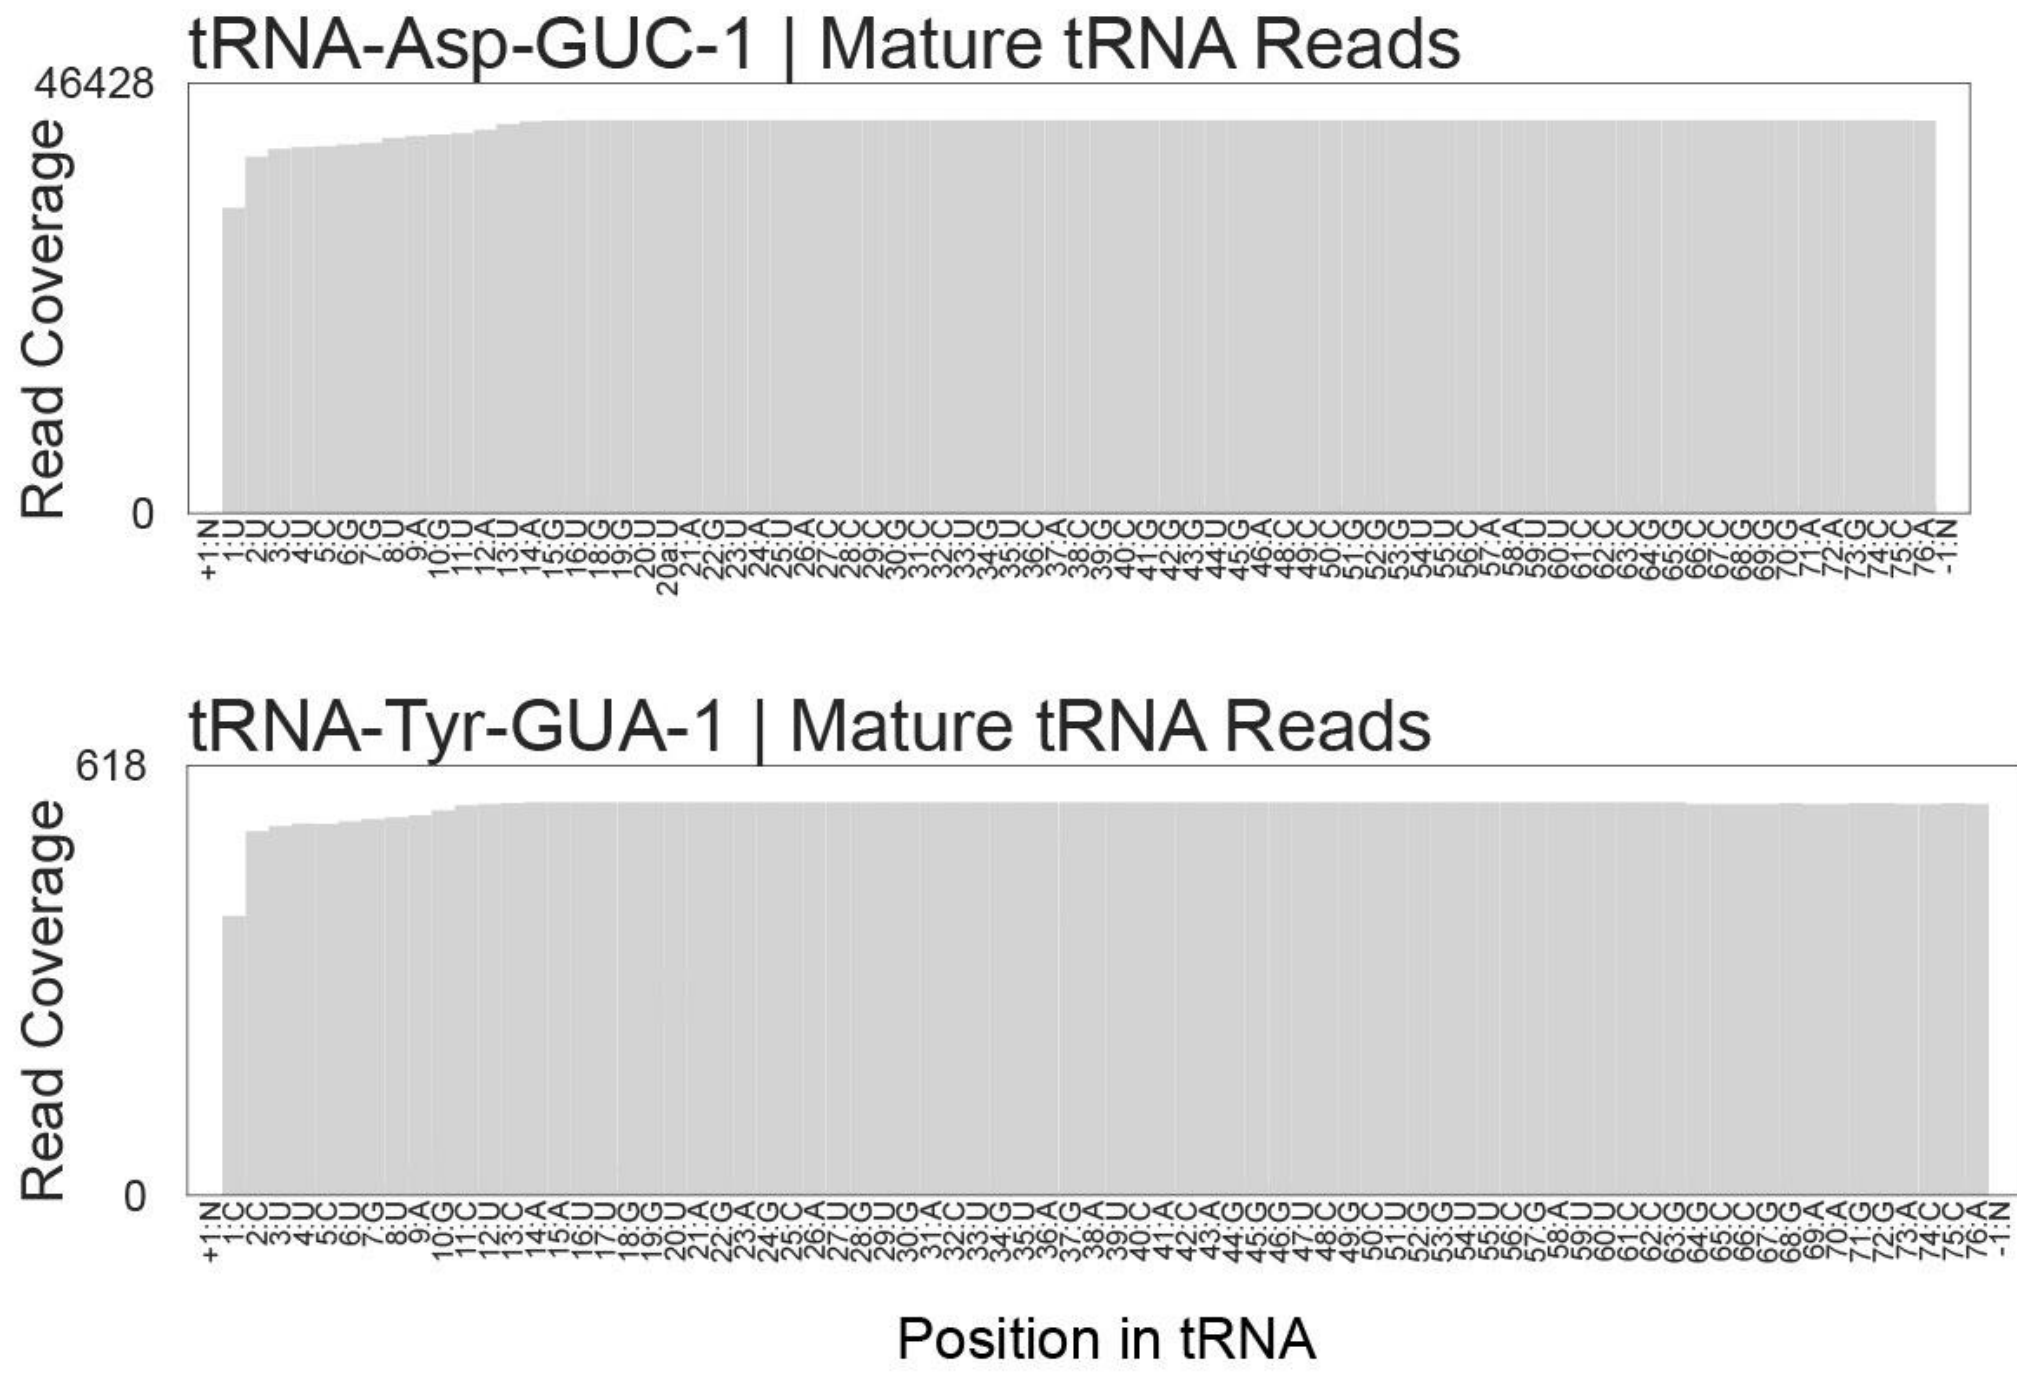

Figure S1A

**B**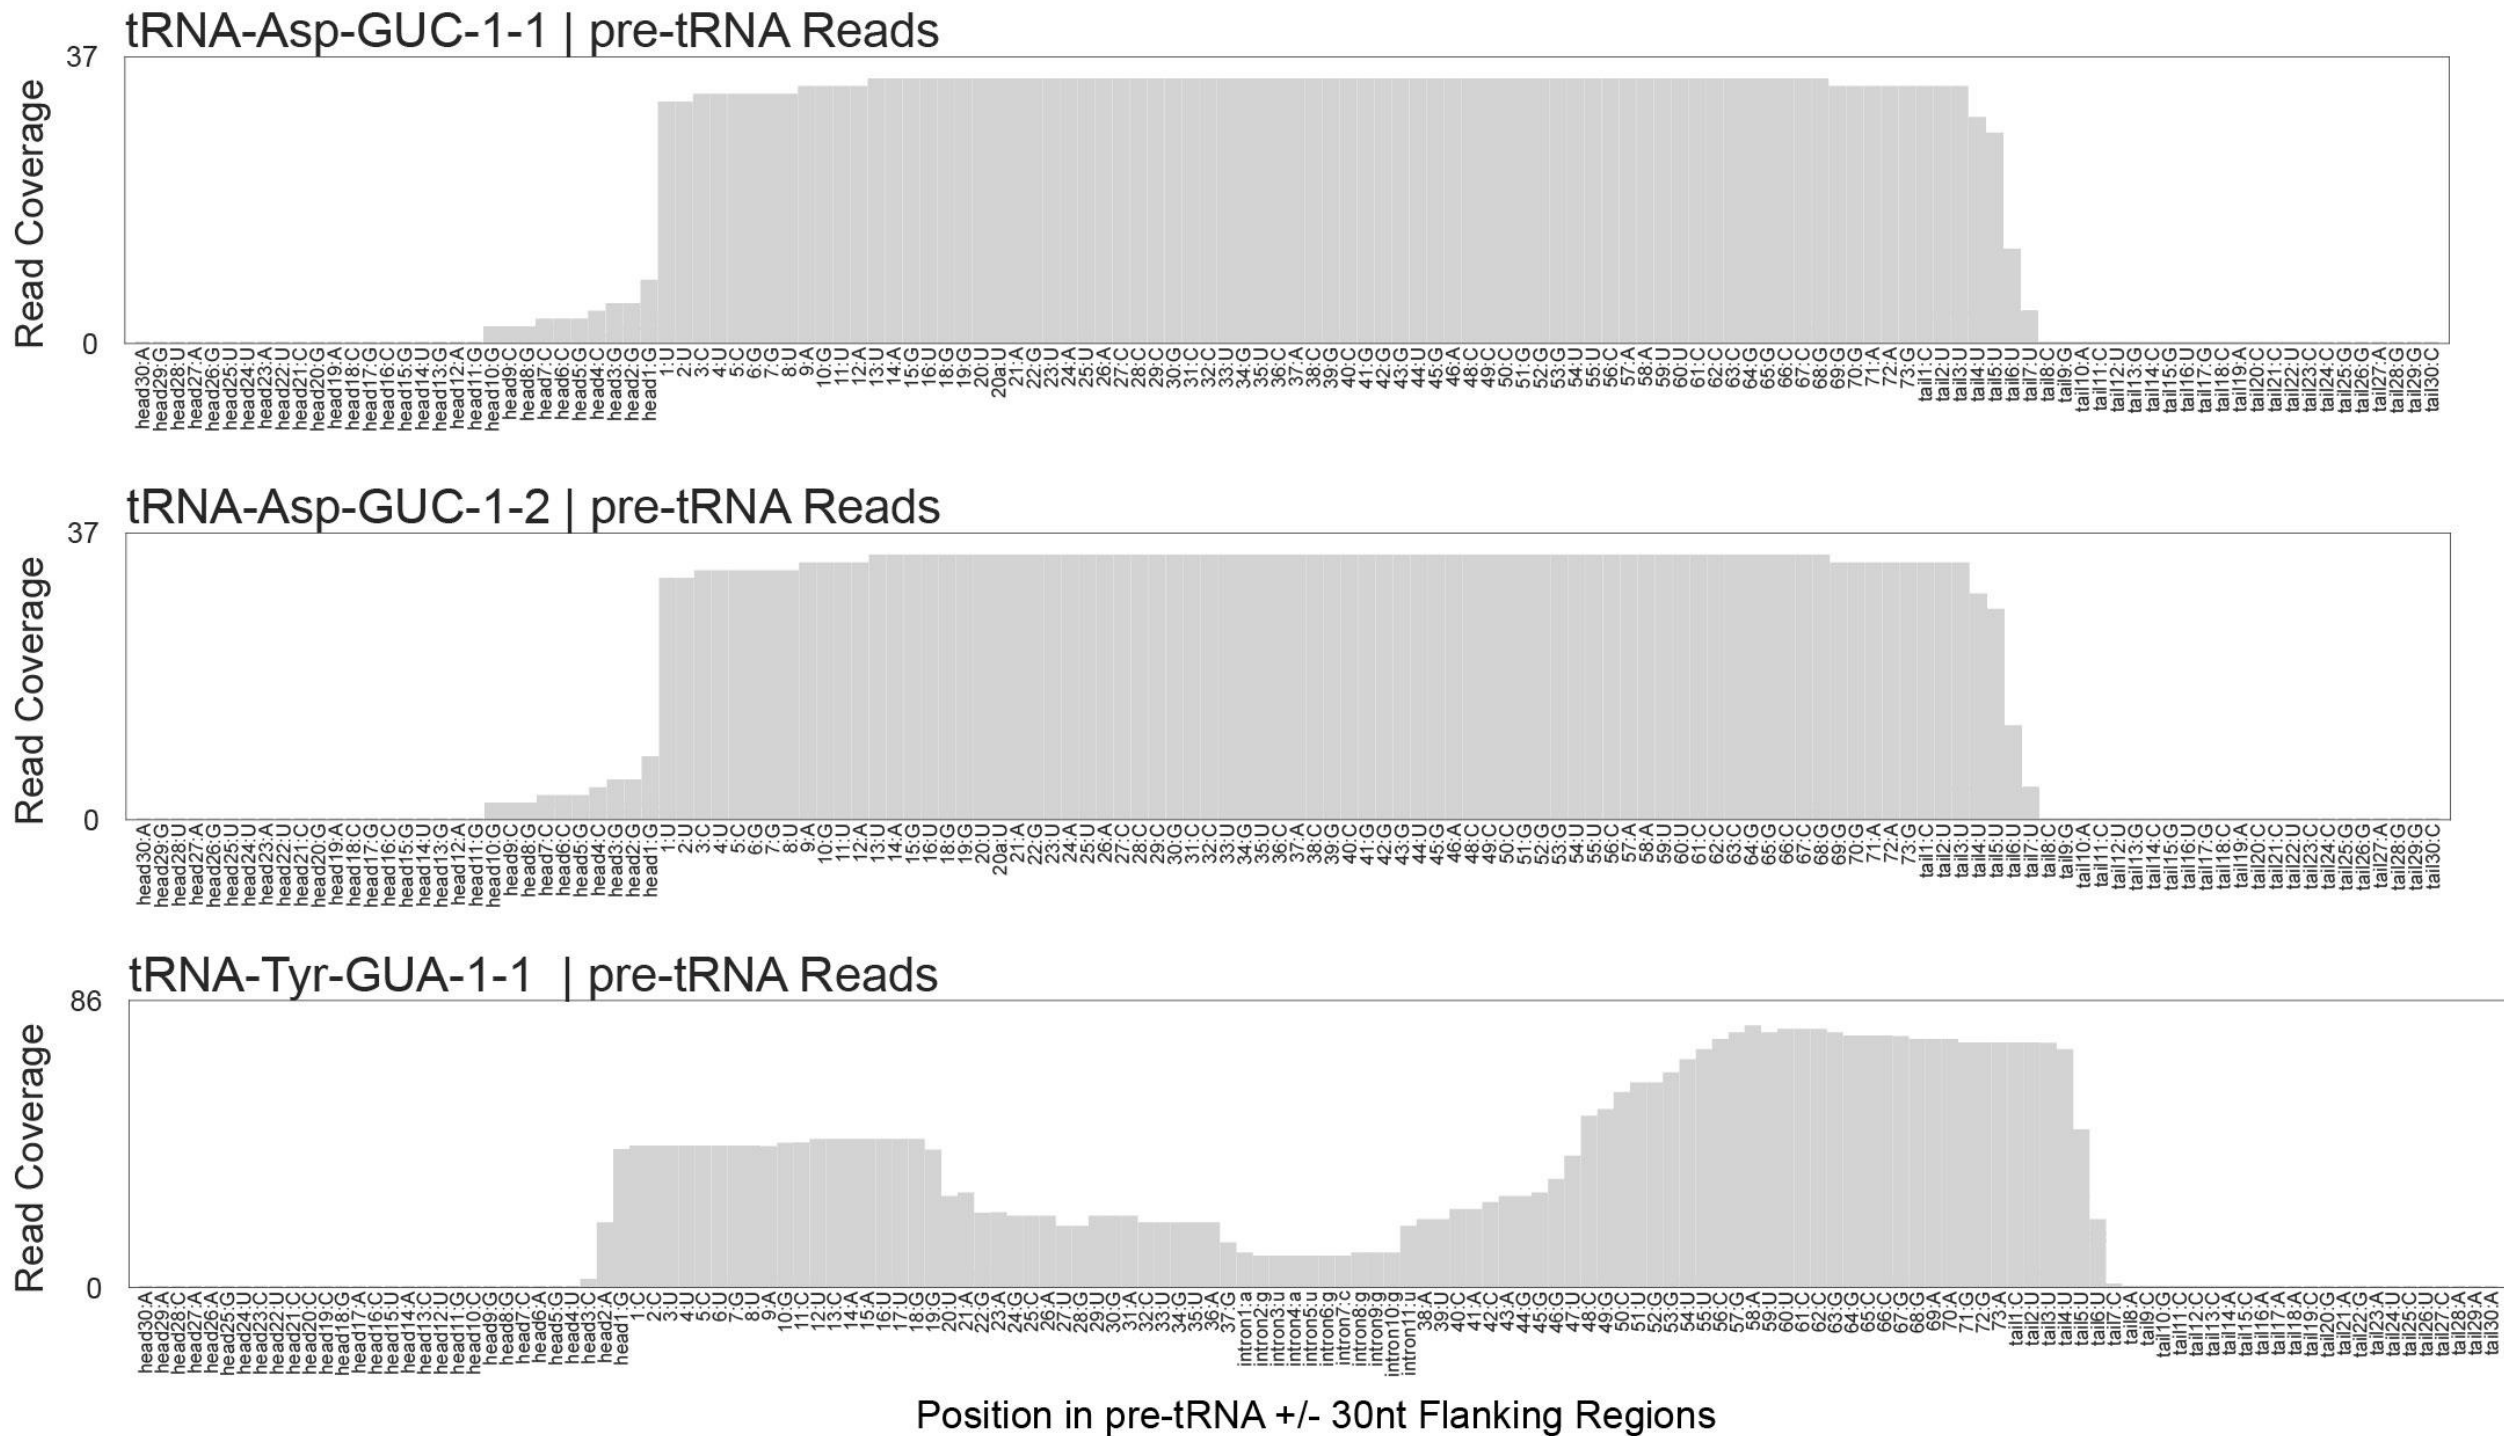**Figure S1B**

**C**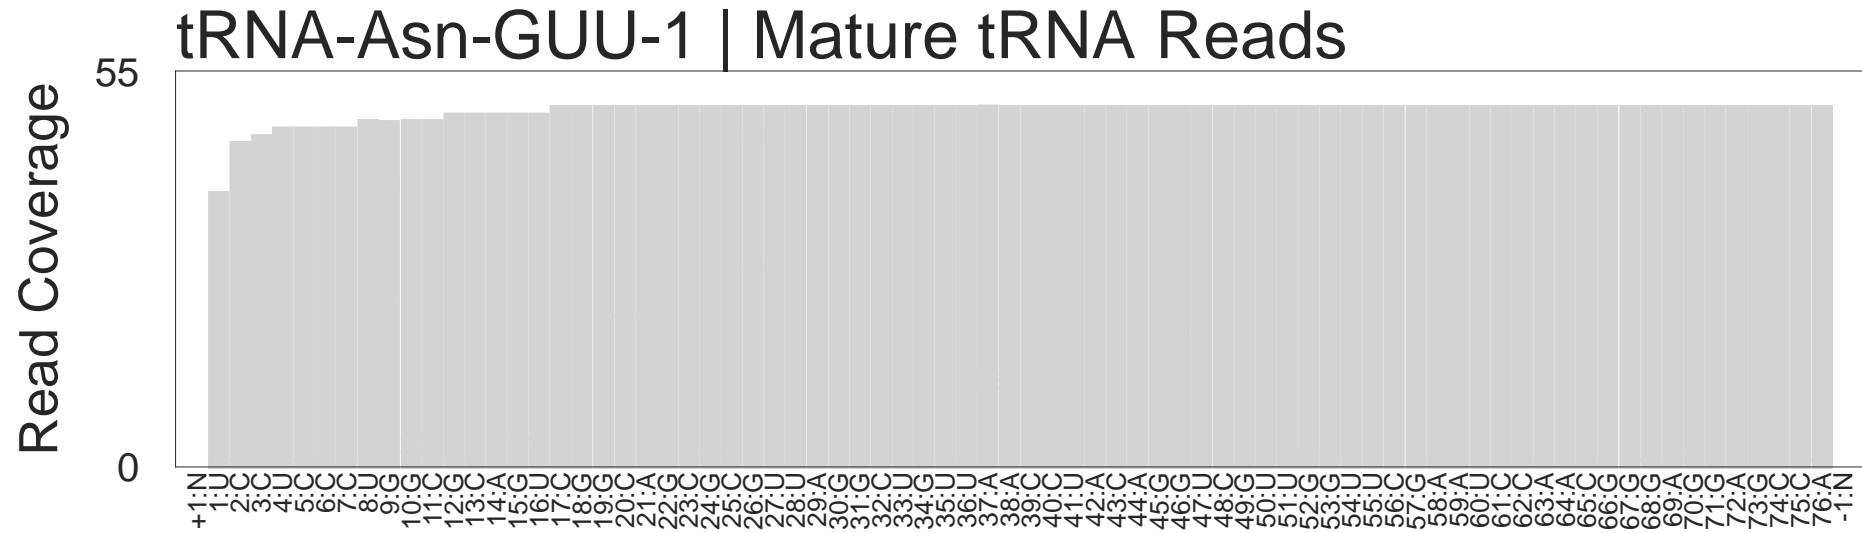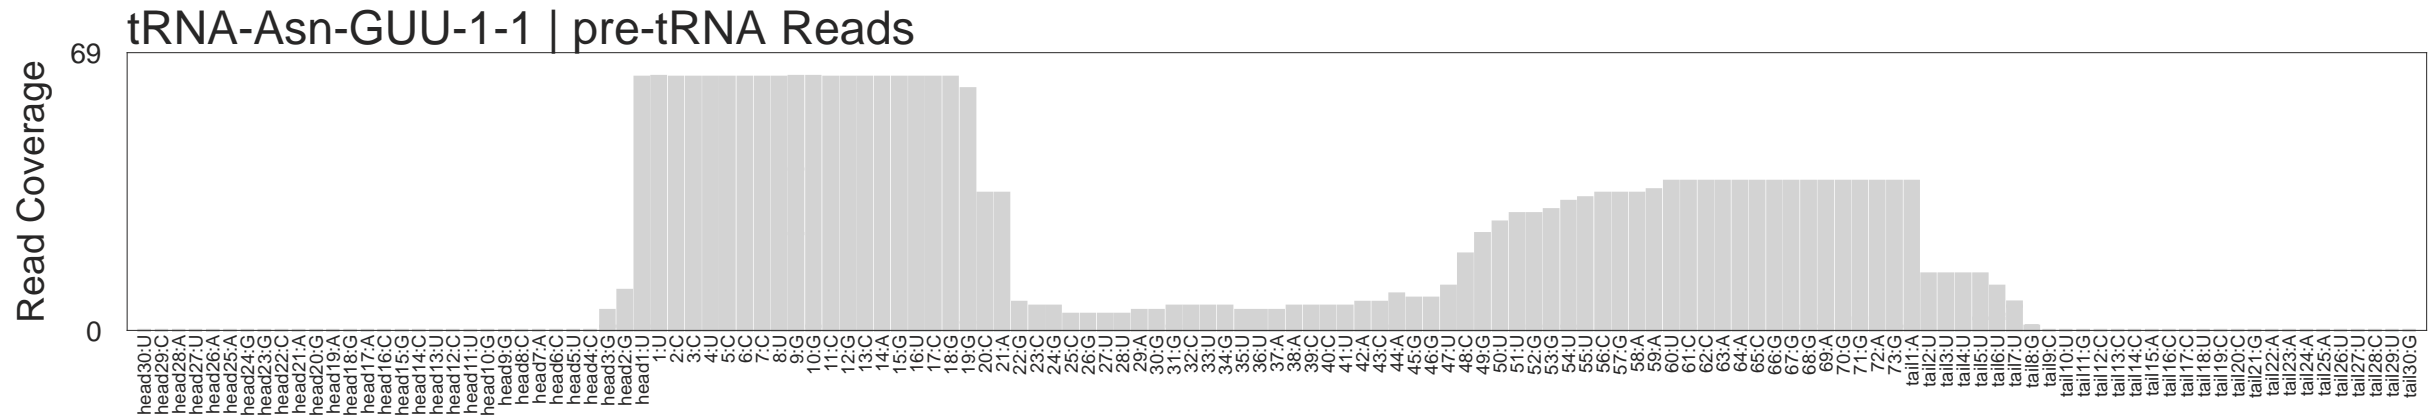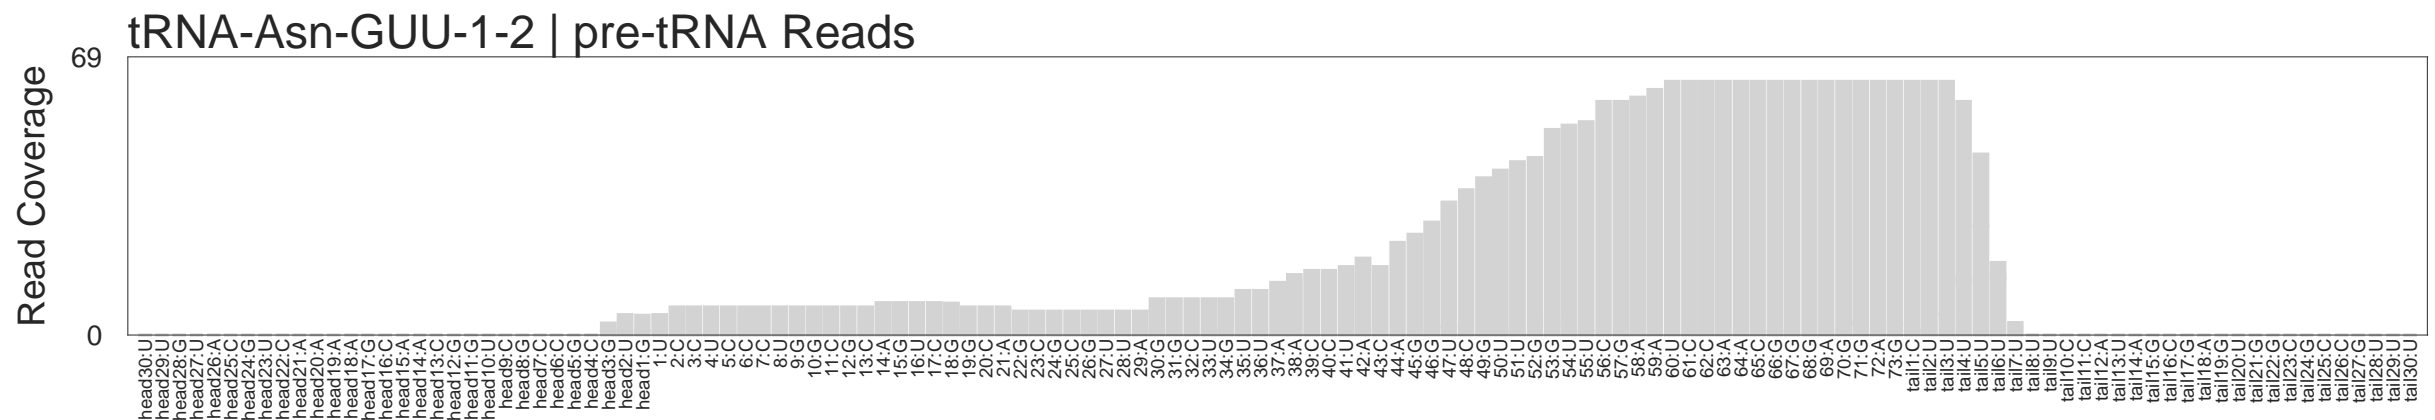**Figure S1C**

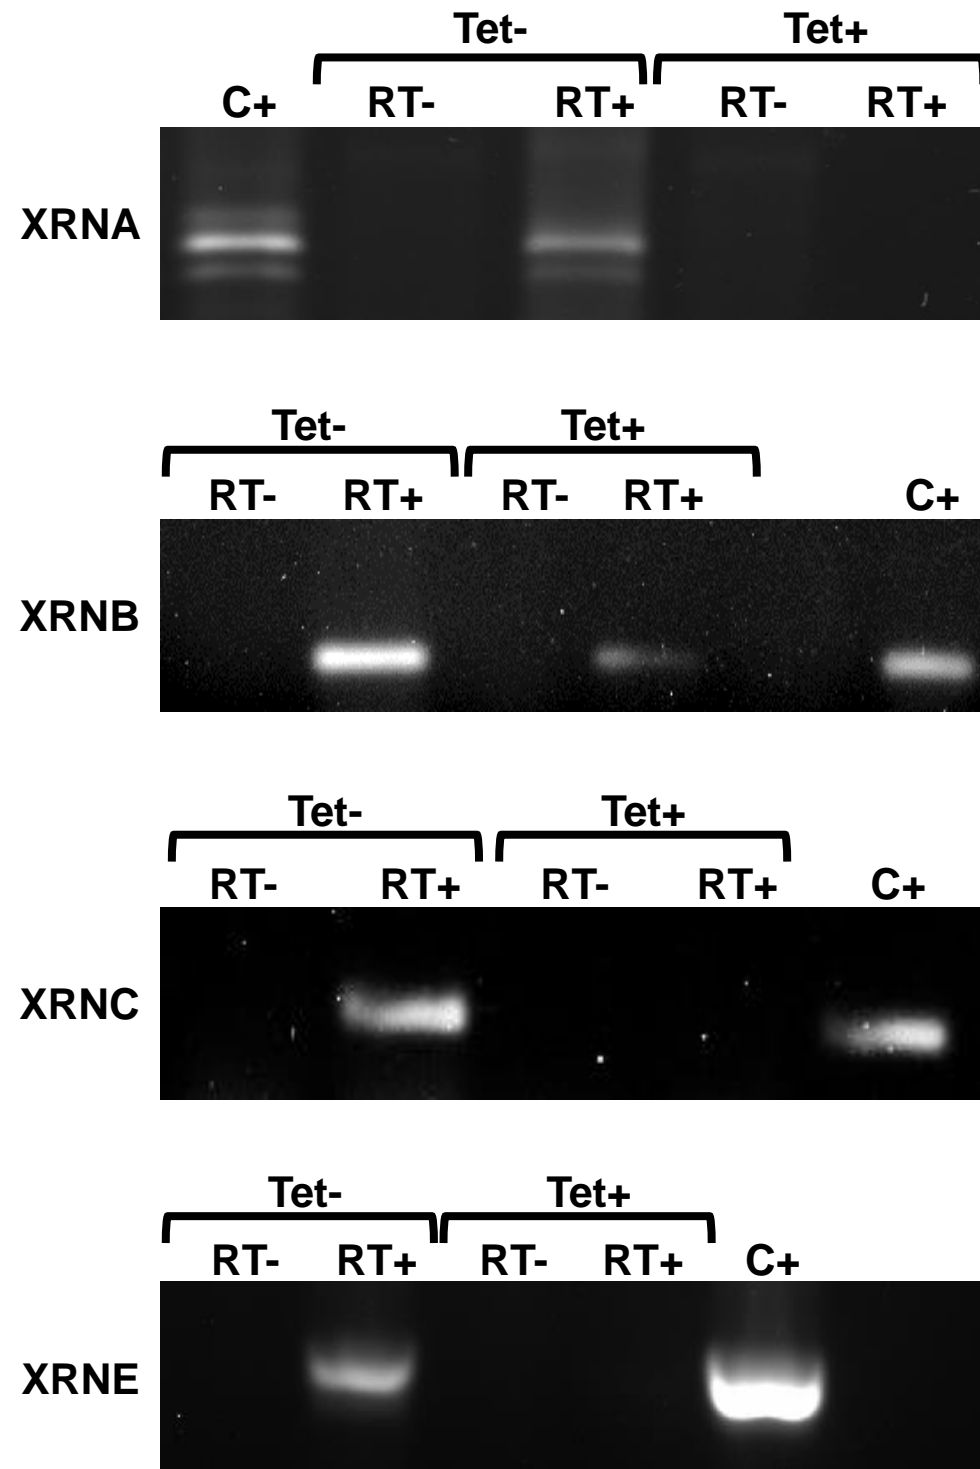

Figure S2

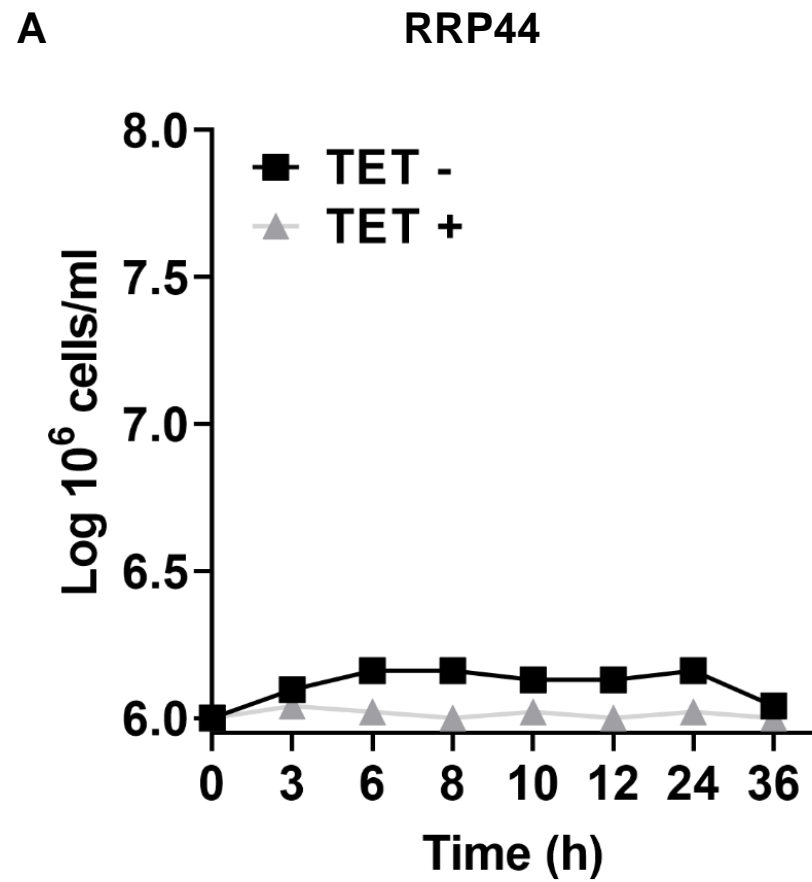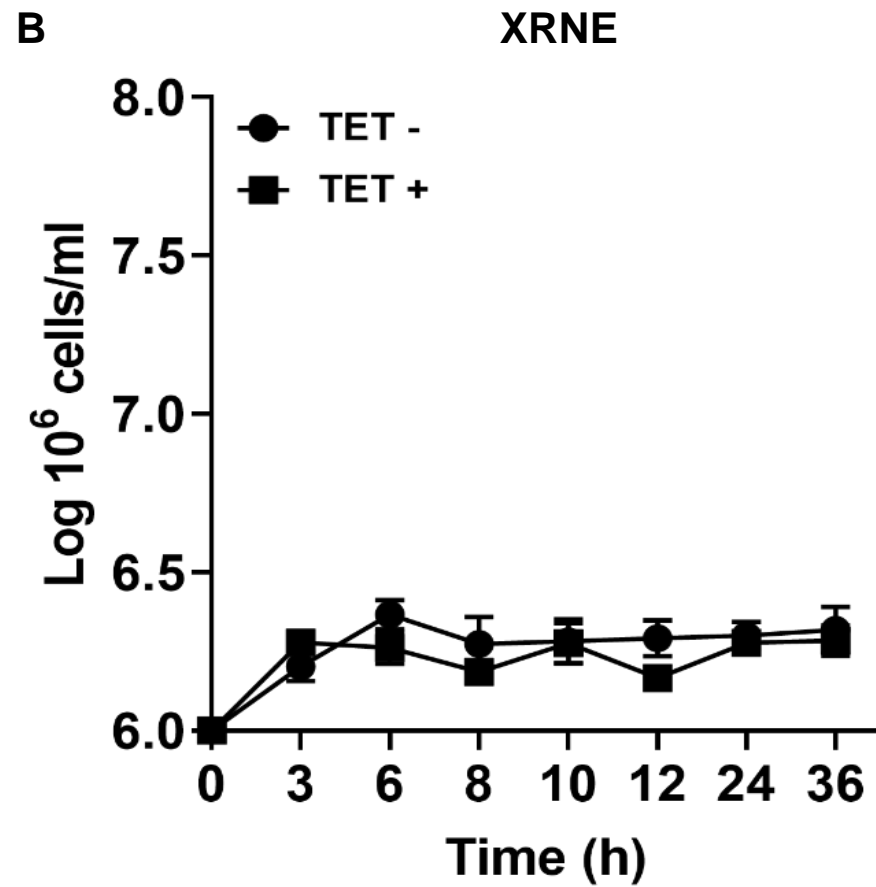

Figure S3

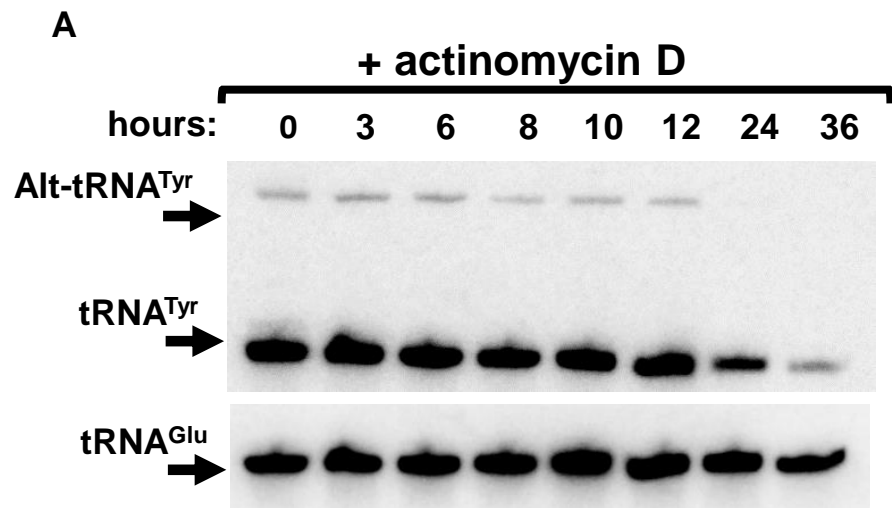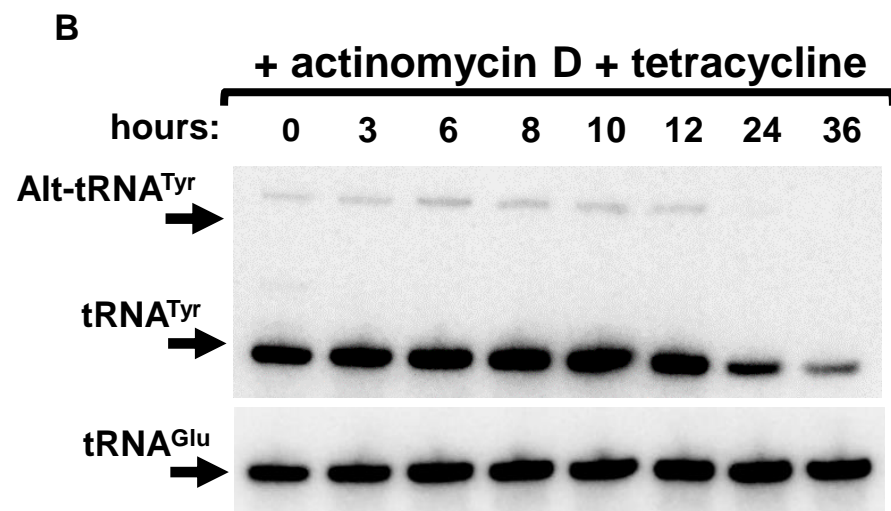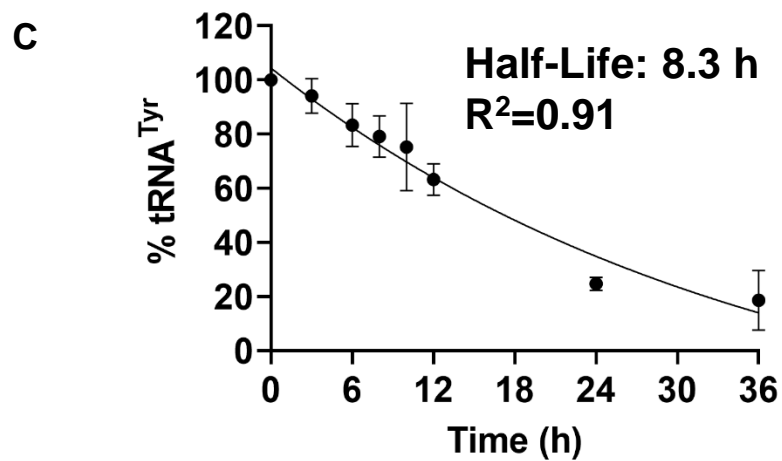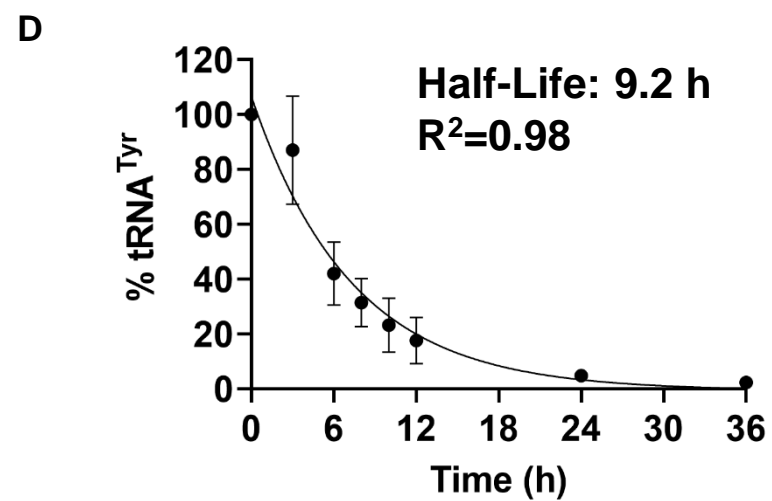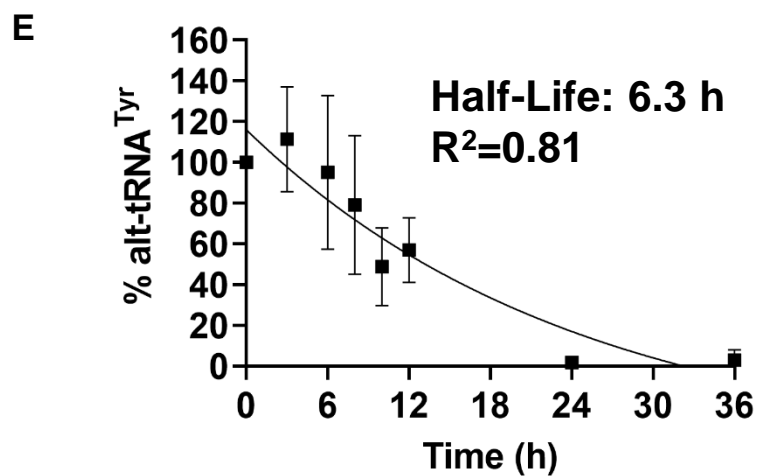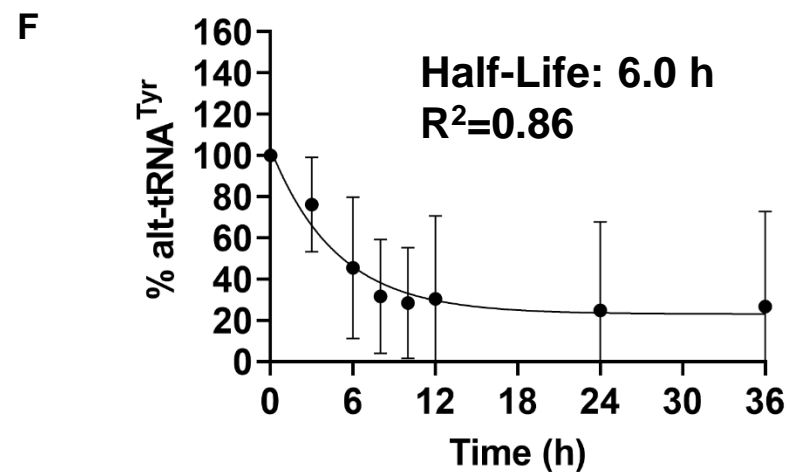

**Figure S4**

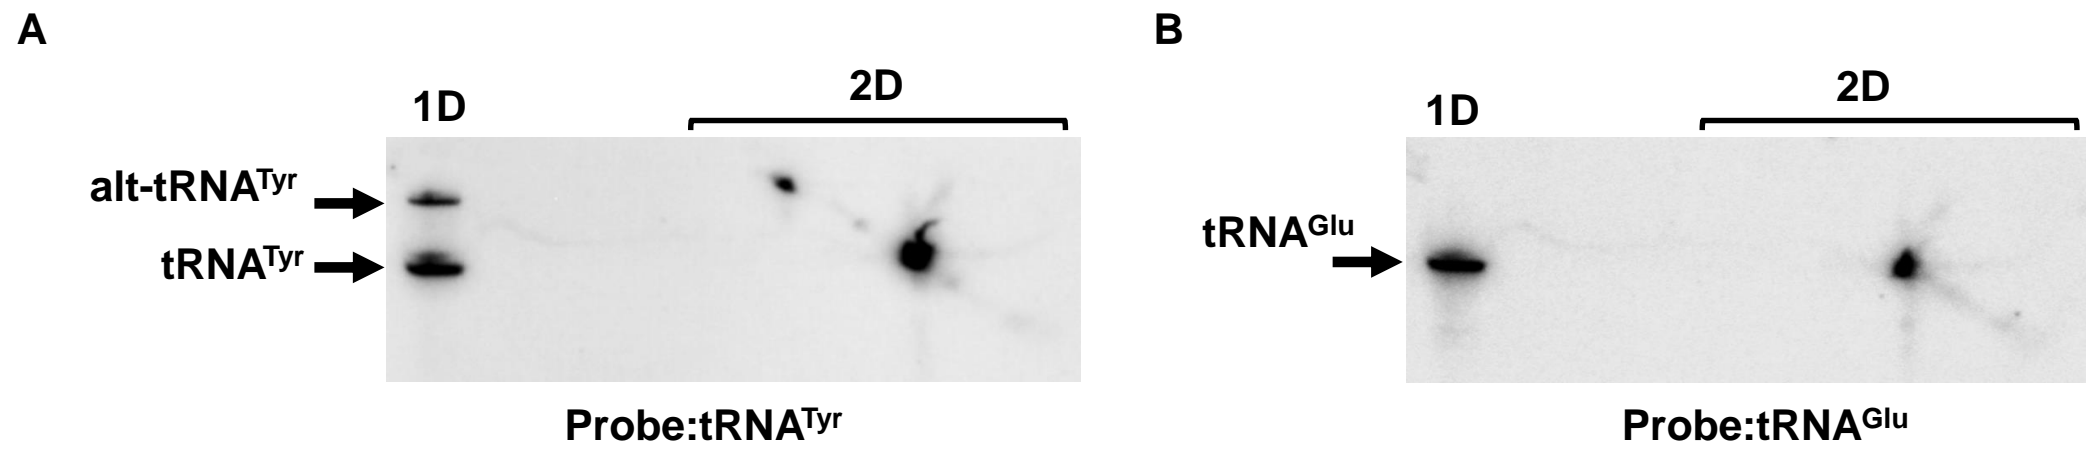

Figure S5

Supplement: supp_079674.123_Supplemental_Figures.pdf [file supp_079674.123_Supplemental_Figures.pdf]
